# Supplementary material for: Global Trends and Correlates of COVID-19 Vaccination Hesitancy: Findings from the iCARE Study
Source: MDPI journal article supplement (doi:10.3390/vaccines9060661), 2021-06-17
Supplement: s1 [file s1]

**Supplementary Table S1.** Recruitment numbers across individual countries (N=32,028), and survey periods mapped onto the COVID-19 epidemiology

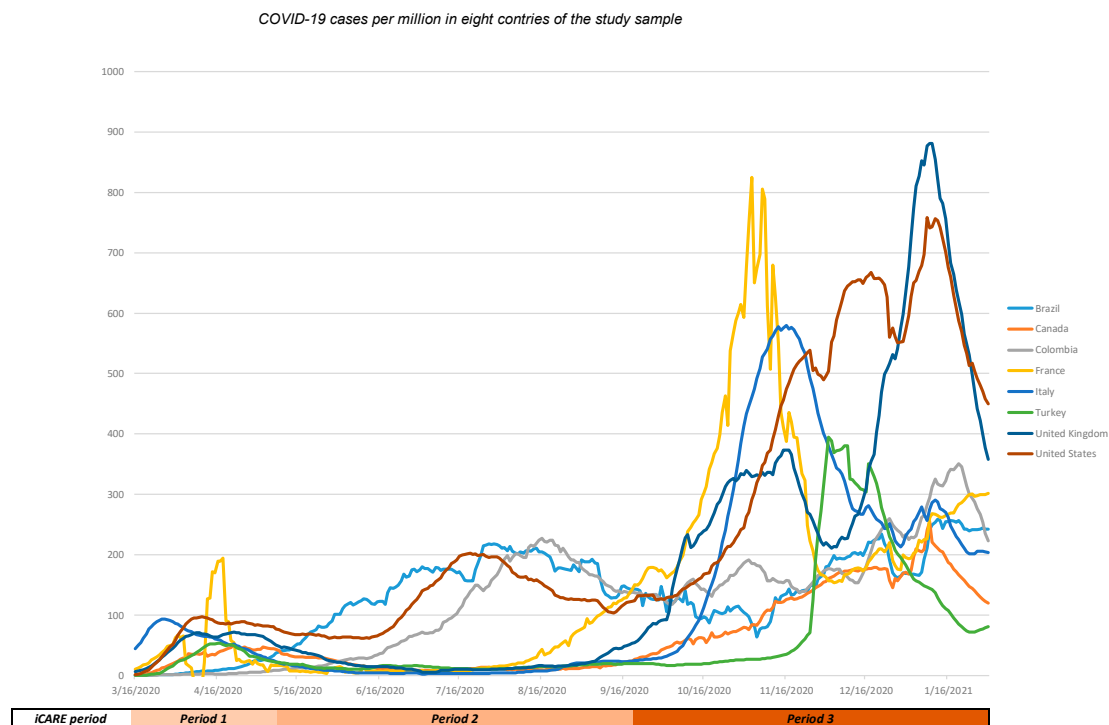

|          | period(Period of survey response) |                                          |                                                                 |       |
|----------|-----------------------------------|------------------------------------------|-----------------------------------------------------------------|-------|
|          | March, April, May                 | June, July, August, September (1st half) | September (2nd half), October, November, December, January 2021 | Total |
| Brazil   | 1123                              | 920                                      | 281                                                             | 2324  |
| Canada   | 9869                              | 3860                                     | 2944                                                            | 16673 |
| Colombia | 1265                              | 884                                      | 199                                                             | 2348  |
| France   | 2998                              | 675                                      | 290                                                             | 3963  |
| Italy    | 1436                              | 395                                      | 235                                                             | 2066  |
| Turkey   | 1061                              | 215                                      | 151                                                             | 1427  |
| UK       | 688                               | 162                                      | 107                                                             | 957   |
| USA      | 1491                              | 615                                      | 164                                                             | 2270  |
| Total    | 19931                             | 7726                                     | 4371                                                            | 32028 |

**Supplementary Table S2. STROBE Checklist.**

|                           | Item No | Recommendation                                                                                                                                                                                    | Page or manuscript section |
|---------------------------|---------|---------------------------------------------------------------------------------------------------------------------------------------------------------------------------------------------------|----------------------------|
| Title and abstract        | 1       | (a) Indicate the study’s design with a commonly used term in the title or the abstract                                                                                                            | 1                          |
|                           |         | (b) Provide in the abstract an informative and balanced summary of what was done and what was found                                                                                               | 1                          |
| Introduction              |         |                                                                                                                                                                                                   |                            |
| Background/rationale      | 2       | Explain the scientific background and rationale for the investigation being reported                                                                                                              | 2                          |
| Objectives                | 3       | State specific objectives, including any prespecified hypotheses                                                                                                                                  | 2                          |
| Methods                   |         |                                                                                                                                                                                                   |                            |
| Study design              | 4       | Present key elements of study design early in the paper                                                                                                                                           | 2                          |
| Setting                   | 5       | Describe the setting, locations, and relevant dates, including periods of recruitment, exposure, follow-up, and data collection                                                                   | 2-3                        |
| Participants              | 6       | (a) Give the eligibility criteria, and the sources and methods of selection of participants                                                                                                       | 2                          |
| Variables                 | 7       | Clearly define all outcomes, exposures, predictors, potential confounders, and effect modifiers. Give diagnostic criteria, if applicable                                                          | 3-4                        |
| Data sources/ measurement | 8       | For each variable of interest, give sources of data and details of methods of assessment (measurement). Describe comparability of assessment methods if there is more than one group              | 4                          |
| Bias                      | 9       | Describe any efforts to address potential sources of bias                                                                                                                                         | 3-4                        |
| Study size                | 10      | Explain how the study size was arrived at                                                                                                                                                         | NA                         |
| Quantitative variables    | 11      | Explain how quantitative variables were handled in the analyses. If applicable, describe which groupings were chosen and why                                                                      | 3-4                        |
| Statistical methods       | 12      | (a) Describe all statistical methods, including those used to control for confounding                                                                                                             | 3-4                        |
|                           |         | (b) Describe any methods used to examine subgroups and interactions                                                                                                                               | 3-4                        |
|                           |         | (c) Explain how missing data were addressed                                                                                                                                                       | 3                          |
|                           |         | (d) If applicable, describe analytical methods taking account of sampling strategy                                                                                                                | NA                         |
|                           |         | (e) Describe any sensitivity analyses                                                                                                                                                             | NA                         |
| Results                   |         |                                                                                                                                                                                                   |                            |
| Participants              | 13*     | (a) Report numbers of individuals at each stage of study—eg numbers potentially eligible, examined for eligibility, confirmed eligible, included in the study, completing follow-up, and analysed | NA                         |
|                           |         | (b) Give reasons for non-participation at each stage                                                                                                                                              | NA                         |
|                           |         | (c) Consider use of a flow diagram                                                                                                                                                                | NA                         |
| Descriptive data          | 14*     | (a) Give characteristics of study participants (eg demographic, clinical, social) and information on exposures and potential confounders                                                          | 4-5                        |
|                           |         | (b) Indicate number of participants with missing data for each variable of interest                                                                                                               | 4                          |

|                          |     |                                                                                                                                                                                                              |                                |
|--------------------------|-----|--------------------------------------------------------------------------------------------------------------------------------------------------------------------------------------------------------------|--------------------------------|
|                          |     |                                                                                                                                                                                                              | And<br>Supplementary<br>tables |
| Outcome data             | 15* | Report numbers of outcome events or summary measures                                                                                                                                                         | 4-6                            |
| Main results             | 16  | (a) Give unadjusted estimates and, if applicable, confounder-adjusted estimates and their precision (eg, 95% confidence interval). Make clear which confounders were adjusted for and why they were included | 4-8 (Tables 2 and 3)           |
|                          |     | (b) Report category boundaries when continuous variables were categorized                                                                                                                                    | 4-8                            |
|                          |     | (c) If relevant, consider translating estimates of relative risk into absolute risk for a meaningful time period                                                                                             | NA                             |
| Other analyses           | 17  | Report other analyses done—eg analyses of subgroups and interactions, and sensitivity analyses                                                                                                               | NA                             |
| <b>Discussion</b>        |     |                                                                                                                                                                                                              |                                |
| Key results              | 18  | Summarise key results with reference to study objectives                                                                                                                                                     | 8                              |
| Limitations              | 19  | Discuss limitations of the study, taking into account sources of potential bias or imprecision. Discuss both direction and magnitude of any potential bias                                                   | 10                             |
| Interpretation           | 20  | Give a cautious overall interpretation of results considering objectives, limitations, multiplicity of analyses, results from similar studies, and other relevant evidence                                   | 8-10                           |
| Generalisability         | 21  | Discuss the generalisability (external validity) of the study results                                                                                                                                        | 10                             |
| <b>Other information</b> |     |                                                                                                                                                                                                              |                                |
| Funding                  | 22  | Give the source of funding and the role of the funders for the present study and, if applicable, for the original study on which the present article is based                                                | 11                             |

**Supplementary Figure S1.** Vaccine intentions in the overall sample (presenting percentages of individuals that are *Extremely likely*, *Somewhat likely*, *Unlikely*, and *Very unlikely* to get the vaccine)

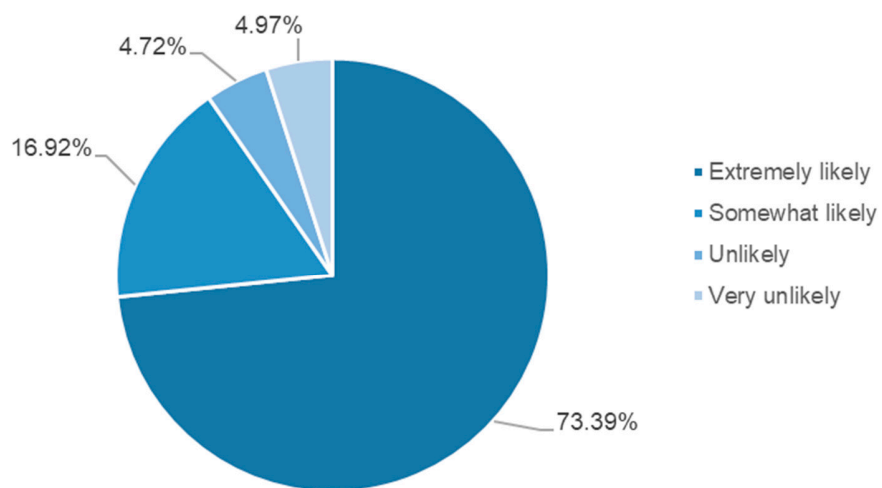

**Supplementary Table S3.** Principal component analysis of 11 concerns-related items in iCARE (overview of item correlations, component mean values, loadings and graphical presentation of Eigen values (Scree plot))

*List of variables used in principal component analysis*

| Variable name | Description                                                       |
|---------------|-------------------------------------------------------------------|
| concernr_01   | [being infected myself]                                           |
| concernr_02   | [the impact of being infected on my health, including dying]      |
| concernr_04   | [losing my job / family income]                                   |
| concernr_06   | [not having enough money for food and/or rent]                    |
| concernr_07   | [infecting other people I live with]                              |
| concernr_08   | [a person with whom I live with being infected]                   |
| concernr_09   | [a family member with whom I do not share my home being infected] |
| concernr_011  | [infecting other people in the community]                         |
| concernr_012  | [there not being enough food left on shelves for people to eat]   |
| concernr_013  | [my country going into an economic recession/depression]          |
| concernr_014  | [how long it will take for things to go back to normal]           |

Correlation matrix for 11 concerns-related variables

|              | concernr_01 | concernr_02 | concernr_04 | concernr_06 | concernr_07 | concernr_08 | concernr_09 | concernr_011 | concernr_012 | concernr_013 | concernr_014 |
|--------------|-------------|-------------|-------------|-------------|-------------|-------------|-------------|--------------|--------------|--------------|--------------|
| concernr_01  | 1           | 0.81581     | 0.27442     | 0.28647     | 0.55862     | 0.58833     | 0.47119     | 0.46131      | 0.37172      | 0.18825      | 0.19095      |
| concernr_02  | 0.81581     | 1           | 0.2892      | 0.31697     | 0.51823     | 0.5847      | 0.46927     | 0.42347      | 0.37246      | 0.17954      | 0.16269      |
| concernr_04  | 0.27442     | 0.2892      | 1           | 0.84422     | 0.3308      | 0.34864     | 0.29549     | 0.30363      | 0.48367      | 0.41691      | 0.31698      |
| concernr_06  | 0.28647     | 0.31697     | 0.84422     | 1           | 0.38657     | 0.38892     | 0.31215     | 0.34207      | 0.56074      | 0.39127      | 0.28122      |
| concernr_07  | 0.55862     | 0.51823     | 0.3308      | 0.38657     | 1           | 0.82759     | 0.62037     | 0.72947      | 0.37113      | 0.19735      | 0.17081      |
| concernr_08  | 0.58833     | 0.5847      | 0.34864     | 0.38892     | 0.82759     | 1           | 0.70876     | 0.65841      | 0.41529      | 0.23274      | 0.19936      |
| concernr_09  | 0.47119     | 0.46927     | 0.29549     | 0.31215     | 0.62037     | 0.70876     | 1           | 0.6694       | 0.34979      | 0.20573      | 0.20952      |
| concernr_011 | 0.46131     | 0.42347     | 0.30363     | 0.34207     | 0.72947     | 0.65841     | 0.6694      | 1            | 0.37412      | 0.22643      | 0.18332      |
| concernr_012 | 0.37172     | 0.37246     | 0.48367     | 0.56074     | 0.37113     | 0.41529     | 0.34979     | 0.37412      | 1            | 0.49852      | 0.34282      |
| concernr_013 | 0.18825     | 0.17954     | 0.41691     | 0.39127     | 0.19735     | 0.23274     | 0.20573     | 0.22643      | 0.49852      | 1            | 0.61225      |
| concernr_014 | 0.19095     | 0.16269     | 0.31698     | 0.28122     | 0.17081     | 0.19936     | 0.20952     | 0.18332      | 0.34282      | 0.61225      | 1            |

Component loadings

| Rotated Pattern             |                                                                   |            |        |        |        |
|-----------------------------|-------------------------------------------------------------------|------------|--------|--------|--------|
|                             |                                                                   | Components |        |        |        |
| Components                  | Individual variables                                              | 1          | 2      | 3      | 4      |
| Health concerns (others)    | [infecting other people in the community]                         | 0.8557     | 0.1561 | 0.1231 | 0.1075 |
|                             | [infecting other people I live with].                             | 0.8317     | 0.1944 | 0.2830 | 0.0449 |
|                             | [a family member with whom I do not share my home being infected] | 0.8142     | 0.1140 | 0.1937 | 0.1271 |
|                             | [a person with whom I live with being infected]                   | 0.8045     | 0.1954 | 0.3580 | 0.0893 |
| Personal financial concerns | [not having enough money for food and/or rent]                    | 0.2033     | 0.9166 | 0.1052 | 0.1429 |
|                             | [losing my job / family income]                                   | 0.1579     | 0.8994 | 0.0893 | 0.1802 |
|                             | [there not being enough food left on shelves for people to eat]   | 0.2359     | 0.5418 | 0.2603 | 0.4099 |
| Health concerns (self)      | [the impact of being infected on my health, including dying]      | 0.3078     | 0.1575 | 0.8833 | 0.0638 |
|                             | [being infected myself]                                           | 0.3465     | 0.1155 | 0.8687 | 0.0960 |
| Social/ economic concerns   | [how long it will take for things to go back to normal]           | 0.0938     | 0.0932 | 0.0642 | 0.8861 |
|                             | [my country going into an economic recession/depression]          | 0.0930     | 0.2891 | 0.0474 | 0.8386 |

### Mean values of components

| Variable                           | N     | Mean | Standard Deviation | Minimum | Maximum |
|------------------------------------|-------|------|--------------------|---------|---------|
| <i>Health concerns (others)</i>    | 27249 | 3.30 | 0.73               | 1       | 4       |
| <i>Health concerns (self)</i>      | 27270 | 3.00 | 0.82               | 1       | 4       |
| <i>Personal financial concerns</i> | 27195 | 2.28 | 0.92               | 1       | 4       |
| <i>Social/ economic concerns</i>   | 27258 | 3.12 | 0.745              | 1       | 4       |

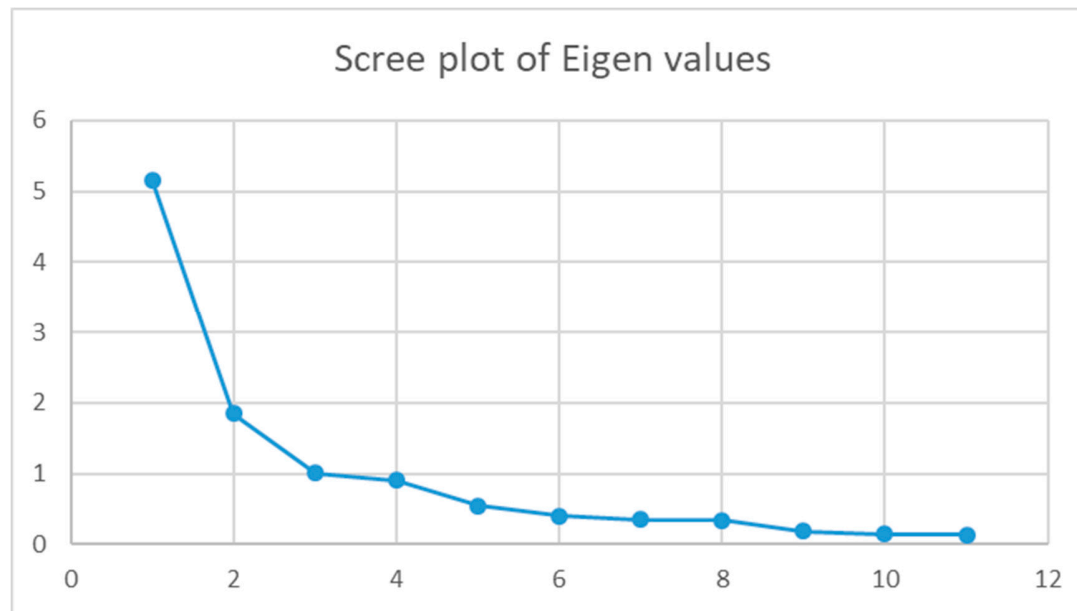

**Supplementary Table S4.** Socio-demographic characteristics of participants (in the overall sample, and across time).

|                                                  | Overall sample |       | Over time |      |          |      |          |      |         |
|--------------------------------------------------|----------------|-------|-----------|------|----------|------|----------|------|---------|
|                                                  |                |       | Period 1  |      | Period 2 |      | Period 3 |      | p-value |
|                                                  | N              | %     | N         | %    | N        | %    | N        | %    |         |
| <b>Sex</b>                                       |                |       |           |      |          |      |          |      |         |
| <i>Women</i>                                     | 22763          | 72.19 | 14379     | 73.2 | 5309     | 69.9 | 3075     | 71.8 | 0.0004  |
| <i>Men</i>                                       | 8769           | 27.81 | 5279      | 26.9 | 2282     | 30.1 | 1208     | 28.2 |         |
| <i>Missing values</i>                            | 496            |       |           |      |          |      |          |      |         |
| <b>Age</b>                                       |                |       |           |      |          |      |          |      |         |
| <i>less or equal then 29</i>                     | 8203           | 26.00 | 5202      | 26.4 | 2223     | 29.3 | 778      | 18.1 | <.0001  |
| <i>30-64 years</i>                               | 19130          | 60.63 | 12244     | 62.2 | 4245     | 56   | 2641     | 61.6 |         |
| <i>65 years or more</i>                          | 4219           | 13.37 | 2230      | 11.3 | 1118     | 14.7 | 871      | 20.3 |         |
| <i>Missing values</i>                            | 476            |       |           |      |          |      |          |      |         |
| <b>Education level</b>                           |                |       |           |      |          |      |          |      |         |
| <i>High school or lower</i>                      | 6004           | 22.72 | 3573      | 21.3 | 1576     | 26.5 | 855      | 23.1 | <.0001  |
| <i>Graduate or Postgraduate degree</i>           | 20427          | 77.28 | 13217     | 78.7 | 4366     | 73.5 | 2844     | 76.9 |         |
| <i>Missing values</i>                            | 5597           |       |           |      |          |      |          |      |         |
| <b>Residential area</b>                          |                |       |           |      |          |      |          |      |         |
| <i>Rural or Country area</i>                     | 3478           | 13.21 | 2442      | 14.5 | 678      | 11.4 | 358      | 10.2 | <.0001  |
| <i>Suburban or Regional</i>                      | 7151           | 27.17 | 4443      | 26.4 | 1671     | 28   | 1037     | 29.6 |         |
| <i>Urban or City</i>                             | 15695          | 59.62 | 9973      | 59.2 | 3613     | 60.6 | 2109     | 60.2 |         |
| <i>Missing values</i>                            | 5704           |       |           |      |          |      |          |      |         |
| <b>Perceived average annual household income</b> |                |       |           |      |          |      |          |      |         |
| <i>Bottom third</i>                              | 3207           | 13.53 | 2095      | 13.8 | 710      | 13.2 | 402      | 12.7 | 0.1028  |
| <i>Middle third</i>                              | 12812          | 54.07 | 8163      | 53.9 | 2953     | 55   | 1696     | 53.4 |         |
| <i>Top third</i>                                 | 7677           | 32.40 | 4894      | 32.3 | 1703     | 31.7 | 1080     | 34   |         |
| <i>Missing values</i>                            | 8332           |       |           |      |          |      |          |      |         |



**Supplementary Table S5.** Socio-demographic characteristics of participants (across individual countries).

|                                        | <i>Countries</i> |          |               |          |                 |          |               |          |              |          |               |          |           |          |            |          |
|----------------------------------------|------------------|----------|---------------|----------|-----------------|----------|---------------|----------|--------------|----------|---------------|----------|-----------|----------|------------|----------|
|                                        | <i>Brazil</i>    |          | <i>Canada</i> |          | <i>Colombia</i> |          | <i>France</i> |          | <i>Italy</i> |          | <i>Turkey</i> |          | <i>UK</i> |          | <i>USA</i> |          |
|                                        | <i>N</i>         | <i>%</i> | <i>N</i>      | <i>%</i> | <i>N</i>        | <i>%</i> | <i>N</i>      | <i>%</i> | <i>N</i>     | <i>%</i> | <i>N</i>      | <i>%</i> | <i>N</i>  | <i>%</i> | <i>N</i>   | <i>%</i> |
| <b><i>Sex</i></b>                      |                  |          |               |          |                 |          |               |          |              |          |               |          |           |          |            |          |
| <i>Women</i>                           | 1699             | 73.8     | 12251         | 74.8     | 1617            | 69.2     | 2720          | 69.6     | 1359         | 66.4     | 729           | 52.1     | 687       | 73.4     | 1701       | 76.6     |
| <i>Men</i>                             | 603              | 26.2     | 4131          | 25.2     | 720             | 30.8     | 1186          | 30.4     | 689          | 33.6     | 671           | 47.9     | 249       | 26.6     | 520        | 23.4     |
| <i>Missing</i>                         | 22               |          | 291           |          | 11              |          | 57            |          | 18           |          | 27            |          | 21        |          | 49         |          |
| <b><i>Age</i></b>                      |                  |          |               |          |                 |          |               |          |              |          |               |          |           |          |            |          |
| <i>less or equal then 29</i>           | 896              | 39       | 3081          | 18.8     | 1021            | 43.8     | 1020          | 26       | 1188         | 58.6     | 189           | 13.5     | 170       | 18.3     | 638        | 28.8     |
| <i>30-64 years</i>                     | 1319             | 57.5     | 10189         | 62       | 1258            | 54       | 2513          | 64.1     | 722          | 35.6     | 1162          | 83.1     | 647       | 69.5     | 1320       | 59.5     |
| <i>65 years or more</i>                | 81               | 3.53     | 3158          | 19.2     | 53              | 2.27     | 386           | 9.85     | 119          | 5.86     | 48            | 3.43     | 114       | 12.2     | 260        | 11.7     |
| <i>Missing</i>                         | 28               |          | 245           |          | 16              |          | 44            |          | 37           |          | 28            |          | 26        |          | 52         |          |
| <b><i>Education</i></b>                |                  |          |               |          |                 |          |               |          |              |          |               |          |           |          |            |          |
| <i>High school or lower</i>            | 419              | 22.2     | 3194          | 23.1     | 418             | 22.5     | 471           | 13.3     | 1046         | 56.7     | 97            | 10       | 97        | 13.2     | 262        | 14.8     |
| <i>Graduate or Postgraduate degree</i> | 1469             | 77.8     | 10635         | 76.9     | 1444            | 77.6     | 3062          | 86.7     | 800          | 43.3     | 872           | 90       | 637       | 86.8     | 1508       | 85.2     |
| <i>Missing</i>                         | 436              |          | 2844          |          | 486             |          | 430           |          | 220          |          | 458           |          | 223       |          | 500        |          |
| <b><i>Area of living</i></b>           |                  |          |               |          |                 |          |               |          |              |          |               |          |           |          |            |          |
| <i>Rural or Country area</i>           | 72               | 3.79     | 1524          | 11.1     | 109             | 5.85     | 828           | 23.4     | 571          | 30.9     | 22            | 2.25     | 195       | 26.6     | 157        | 8.95     |
| <i>Suburban or Regional</i>            | 82               | 4.32     | 4437          | 32.4     | 109             | 5.85     | 940           | 26.6     | 226          | 12.2     | 102           | 10.5     | 324       | 44.1     | 931        | 53.1     |
| <i>Urban or City</i>                   | 1744             | 91.9     | 7753          | 56.5     | 1644            | 88.3     | 1767          | 50       | 1053         | 56.9     | 852           | 87.3     | 215       | 29.3     | 667        | 38       |
| <i>Missing</i>                         | 426              |          | 2959          |          | 486             |          | 428           |          | 216          |          | 451           |          | 223       |          | 515        |          |
| <b><i>Perceived income</i></b>         |                  |          |               |          |                 |          |               |          |              |          |               |          |           |          |            |          |
| <i>Bottom third</i>                    | 273              | 14.9     | 1844          | 14.8     | 133             | 8.13     | 331           | 10       | 213          | 16.5     | 83            | 8.81     | 88        | 13.4     | 242        | 15.5     |
| <i>Middle third</i>                    | 1350             | 73.6     | 6399          | 51.3     | 921             | 56.3     | 1698          | 51.4     | 797          | 61.5     | 550           | 58.4     | 372       | 56.7     | 725        | 46.5     |
| <i>Top third</i>                       | 211              | 11.5     | 4228          | 33.9     | 581             | 35.5     | 1274          | 38.6     | 285          | 22       | 309           | 32.8     | 196       | 29.9     | 593        | 38       |
| <i>Missing</i>                         | 490              |          | 4202          |          | 713             |          | 660           |          | 771          |          | 485           |          | 301       |          | 710        |          |
